# Supplementary material
Source: PubMed Central journal article supplement (PMC2675734)
Supplement: pp.108.133520_2.pdf [file pp.108.133520_2.pdf]

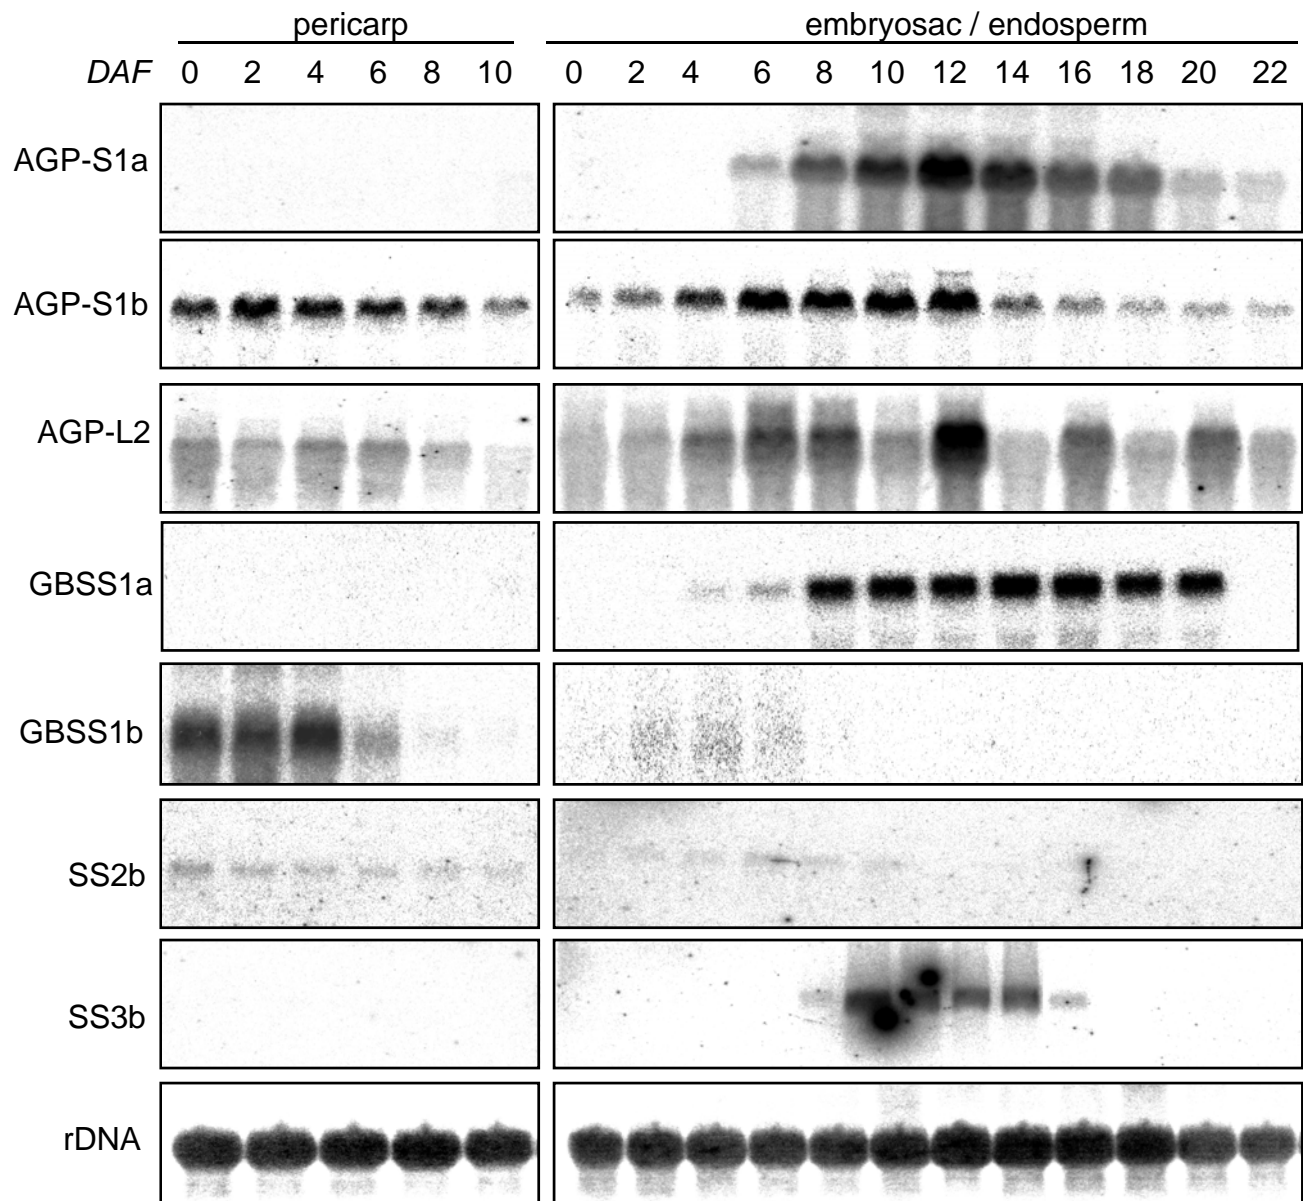

**Supplemental Figure S1a.** Results of Northern blot hybridizations using fragments of cDNAs of starch synthesis enzymes as probes.

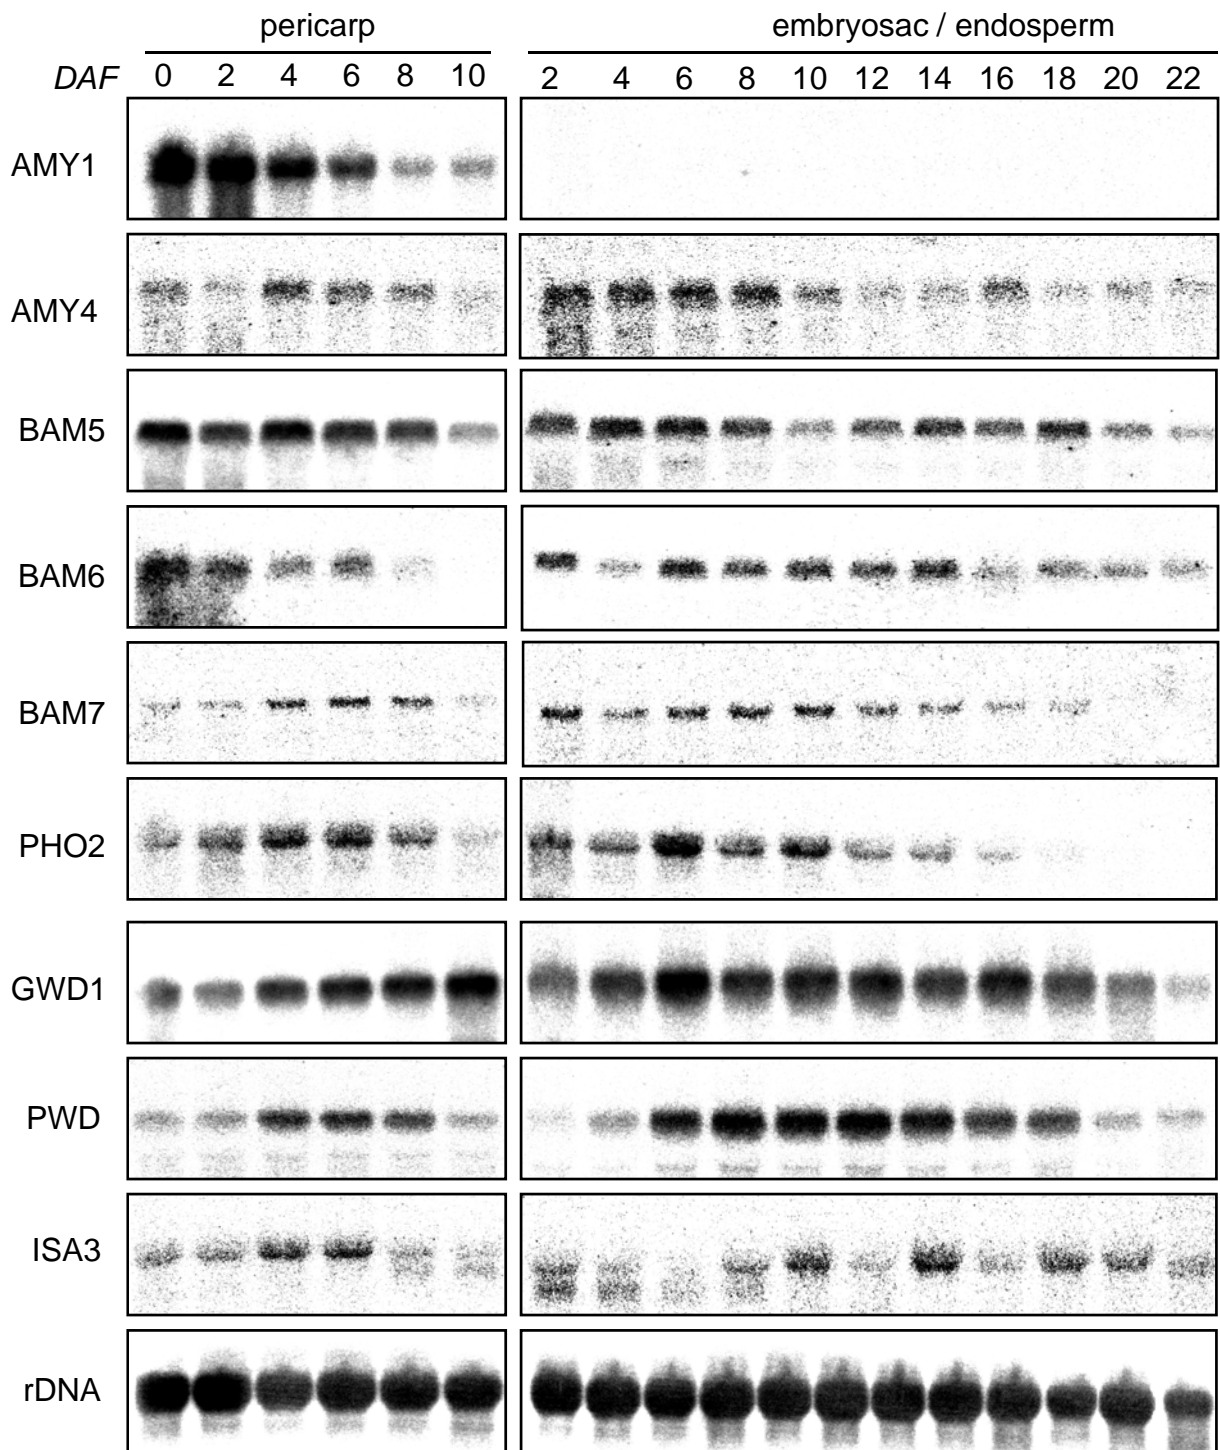

**Supplemental Figure S1b.** Results of Northern blot hybridizations using fragments of cDNAs of enzymes for starch breakdown as probes.
